# Supplementary material for: Structure of mycobacterial CIII2CIV2 respiratory supercomplex bound to the tuberculosis drug candidate telacebec (Q203)
Source: eLife journal article supplement (doi:10.7554/elife.71959), 2021-09-30
Supplement: supp [file elife-71959-supp-v1.zip]

***eLife’s* transparent reporting form**

We encourage authors to provide detailed information *within their submission* to facilitate the interpretation and replication of experiments. Authors can upload supporting documentation to indicate the use of appropriate reporting guidelines for health-related research (see [EQUATOR Network](http://www.equator-network.org/%20)), life science research (see the [BioSharing Information Resource](https://biosharing.org/)), or the [ARRIVE guidelines](http://www.plosbiology.org/article/info:doi/10.1371/journal.pbio.1000412) for reporting work involving animal research. Where applicable, authors should refer to any relevant reporting standards documents in this form.

If you have any questions, please consult our Journal Policies and/or contact us: [editorial@elifesciences.org](mailto:editorial@elifesciences.org).

**Sample-size estimation**

- You should state whether an appropriate sample size was computed when the study was being designed
- You should state the statistical method of sample size computation and any required assumptions
- If no explicit power analysis was used, you should describe how you decided what sample (replicate) size (number) to use

Please outline where this information can be found within the submission (e.g., sections or figure legends), or explain why this information doesn’t apply to your submission:

Not applicable. There is no selected sample size. In cryo-EM one does not choose a sample size for statistical power to test a hypothesis. Instead, for a given number of particle images (described in table 1) the resolution (related to statistical power at each frequency) is determined.

**Replicates**

- You should report how often each experiment was performed
- You should include a definition of biological versus technical replication
- The data obtained should be provided and sufficient information should be provided to indicate the number of independent biological and/or technical replicates
- If you encountered any outliers, you should describe how these were handled
- Criteria for exclusion/inclusion of data should be clearly stated
- High-throughput sequence data should be uploaded before submission, with a private link for reviewers provided (these are available from both GEO and ArrayExpress)

Please outline where this information can be found within the submission (e.g., sections or figure legends), or explain why this information doesn’t apply to your submission:

For cryoEM the question of replicates is not applicable. One typically does not replicate a structure determination (beyond the two independent half-maps used for resolution assessment) as the cryoEM maps are inherently the average of many replicas of the complex.

For enzyme activity assays to measure specific activity, six independent assays were performed (technical replicates, repeated use of the instrument with equivalent experimental conditions) and all measurements were included in the average and standard deviation calculation without outliers.

For enzyme inhibition curves, three independent titrations were performed (technical replicates, repeated use of the instrument with equivalent experimental conditions) and all measurements were included in the average and standard deviation calculation without outliers.

**Statistical reporting**

- Statistical analysis methods should be described and justified
- Raw data should be presented in figures whenever informative to do so (typically when N per group is less than 10)
- For each experiment, you should identify the statistical tests used, exact values of N, definitions of center, methods of multiple test correction, and dispersion and precision measures (e.g., mean, median, SD, SEM, confidence intervals; and, for the major substantive results, a measure of effect size (e.g., Pearson's r, Cohen's d)
- Report exact p-values wherever possible alongside the summary statistics and 95% confidence intervals. These should be reported for all key questions and not only when the p-value is less than 0.05.

Please outline where this information can be found within the submission (e.g., sections or figure legends), or explain why this information doesn’t apply to your submission:

Standard cryoEM map and model statistics are given in Table 1.

For enzyme assays the line and the caption from Figure 2 give statistical information.

In addition Results section “*Nanomolar telacebec inhibits oxidoreductase activity with purified CIII2CIV2*” has the sentence:

With 500 nM SOD added, the CIII2CIV2’s DMW:O2 oxidoreductase activity was measured at 91 4 e-/s ( s.d., n=6 independent assays, with three each from two separate batches of protein)

(For large datasets, or papers with a very large number of statistical tests, you may upload a single table file with tests, Ns, etc., with reference to sections in the manuscript.)

**Group allocation**

- Indicate how samples were allocated into experimental groups (in the case of clinical studies, please specify allocation to treatment method); if randomization was used, please also state if restricted randomization was applied
- Indicate if masking was used during group allocation, data collection and/or data analysis

Please outline where this information can be found within the submission (e.g., sections or figure legends), or explain why this information doesn’t apply to your submission:

Not applicable. There was no manual allocation of samples into experimental groups. Particle images are randomly allocated into half-maps as described in the methods sections and as is standard in cryoEM. No group allocation was used with enzyme assays.

**Additional data files (“source data”)**

- We encourage you to upload relevant additional data files, such as numerical data that are represented as a graph in a figure, or as a summary table
- Where provided, these should be in the most useful format, and they can be uploaded as “Source data” files linked to a main figure or table
- Include model definition files including the full list of parameters used
- Include code used for data analysis (e.g., R, MatLab)
- Avoid stating that data files are “available upon request”

Please indicate the figures or tables for which source data files have been provided:

Figures 1 and 3 use data that is deposited in the EMDB and PDB.
